# Supplementary material for: Improving thein vitroandin vivobioavailability of pterostilbene using Yesso scallop gonad protein isolates-epigallocatechin gallate (EGCG) conjugate-based emulsions: effects of carrier oil
Source: Royal Society of Chemistry journal article supplement (doi:10.1039/d2fo01648f), 2022-01-01
Supplement: d2fo01648f1.pdf [file d2fo01648f1.pdf]

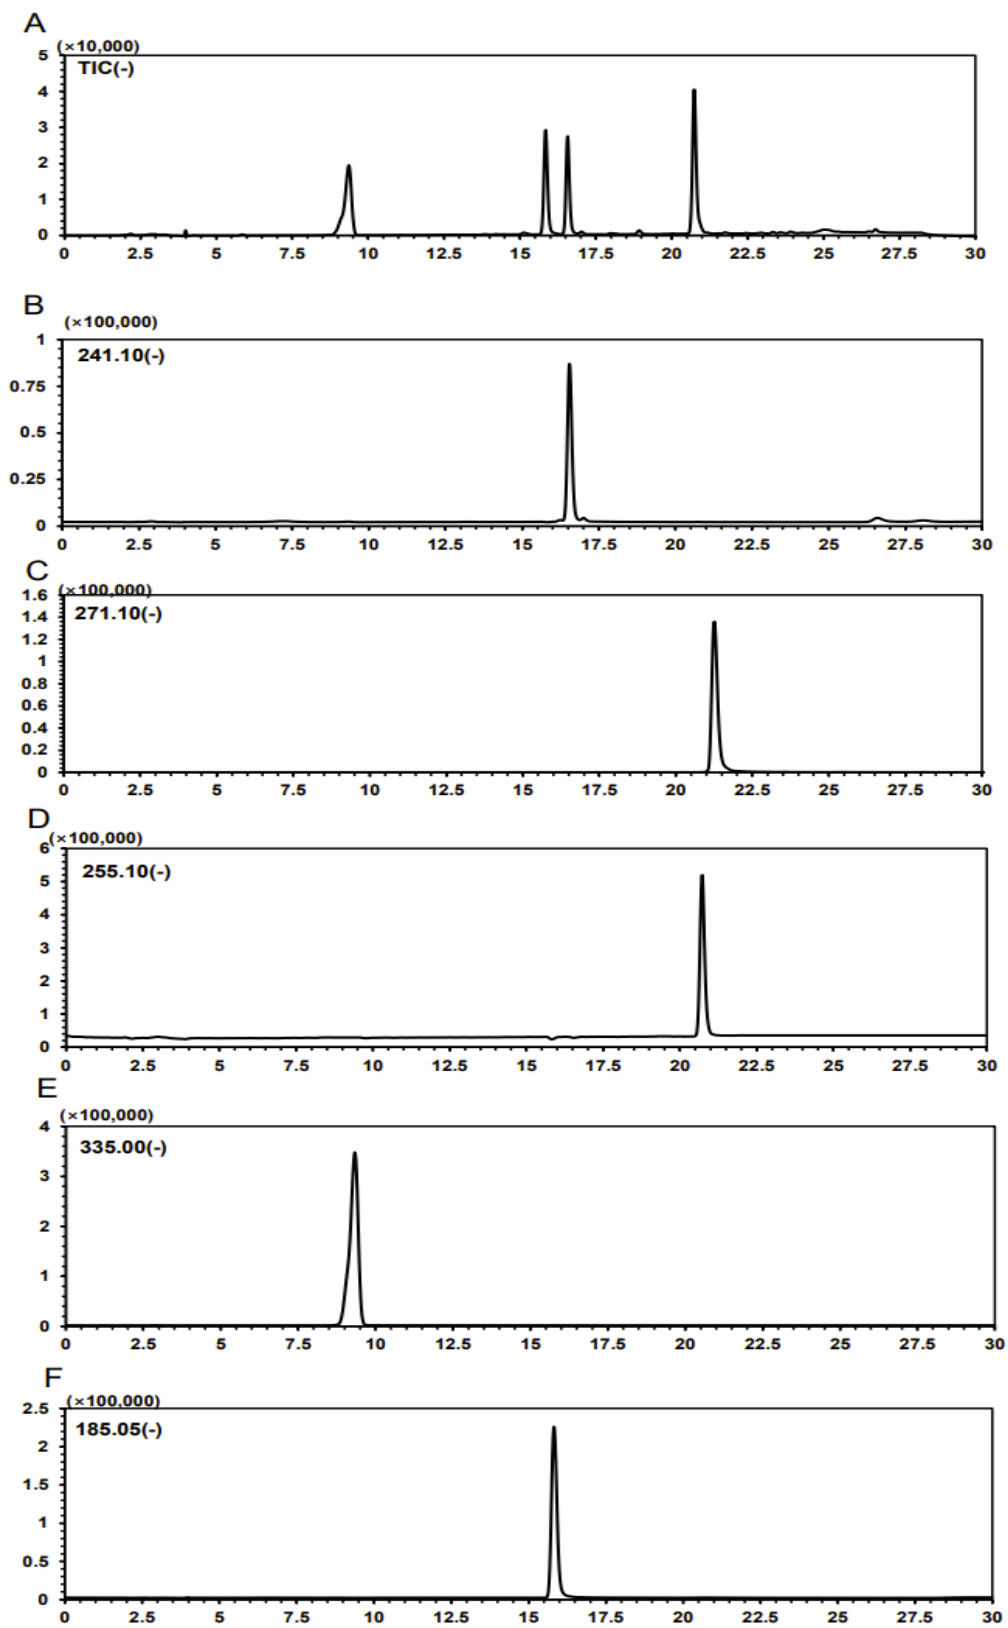

**Fig. S1**

**A**

|                       | <b>Corn oil</b> | <b>MCT</b> | <b>Olive oil</b> | <b>Sunflower oil</b> |
|-----------------------|-----------------|------------|------------------|----------------------|
| Saturated fatty acids | 6.5             | 99.5       | 16.1             | 10.1                 |
| Oleic acid (C18:1)    | 65.6            | 0.23       | 70.9             | 22.2                 |
| Linoleic acid (C18:2) | 25.2            | 0.066      | 9.8              | 62.0                 |
| Linoleic acid (C18:3) | 0.10            | 0          | 0.8              | 0.2                  |

**B**

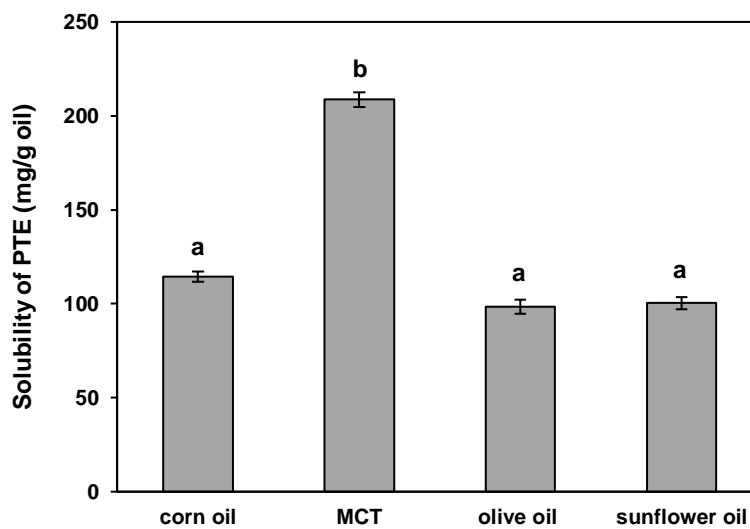

**Fig. S2**

**A**

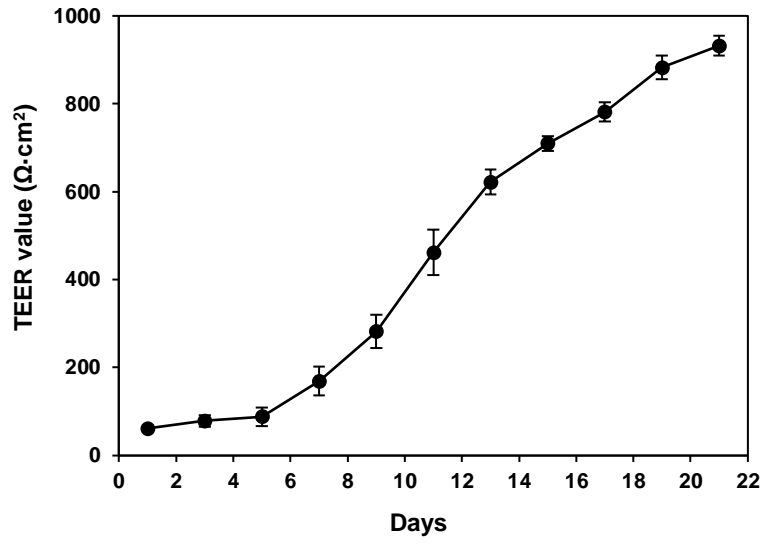

**B**

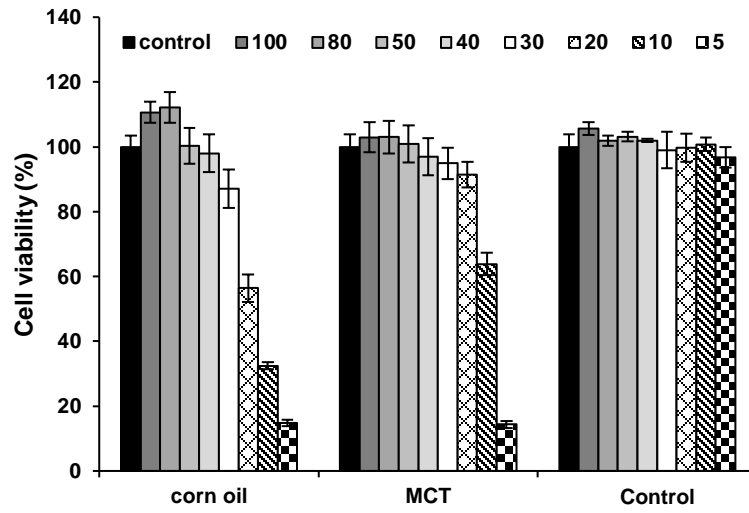

**Fig. S3**
